# Supplementary material for: Diversity of Peptides Produced by Nodularia spumigena from Various Geographical Regions
Source: Mar Drugs. 2012 Dec 21;11(1):1–19. doi: 10.3390/md11010001 (PMC3564153; doi:10.3390/md11010001)

# Supplementary Information

## Table of Contents

**Figure S1.** Total ion current chromatograms of *N. spumigena* strains: NSBL-06 (A), NSBR-02 (B), CCNP1401 (C) and BY1 (D). 3

**Figure S2.** Enhanced ion product mass spectra of spumigin **12** Hpla-Tyr-Pro-Argal with [M + H] ion at  $m/z$  583 (*N. spumigena* 1403). The structure was elucidated mainly based on the mass signals at  $m/z$ : 565 [M + H – H<sub>2</sub>O], 523 [M + H – H<sub>2</sub>O – CH<sub>2</sub>N<sub>2</sub>], 425 [Hpla-Tyr-Pro + H], 300 [Hpla-Tyr + H – CO], 239 [Pro-Argal + H – NH<sub>2</sub>], 221 [Pro-Argal + H – H<sub>2</sub>O – NH<sub>2</sub>], 142 [Argal + H – NH<sub>3</sub>], 136 Tyr-immonium ion, 100 [C<sub>4</sub>H<sub>10</sub>N<sub>3</sub>] Argal fragment, 70 Pro-immonium ion. 4

**Figure S3.** Enhanced ion product mass spectra of spumigin **13** Hpla-Hty-MePro-Agm with [M + H] ion at  $m/z$  583 (*N. spumigena* Nodh2). The structure was elucidated mainly based on the mass signals at  $m/z$ : 565 [M + H – H<sub>2</sub>O], 541 [M + H – CH<sub>2</sub>N<sub>2</sub>], 523 [M + H – H<sub>2</sub>O – CH<sub>2</sub>N<sub>2</sub>], 453 [Hpla-Hty-MePro + H], 342 [Hpla-Hty + H], 314 [Hpla-Hty + H – CO], 225 [MePro-Agm + H – NH<sub>2</sub>], 208 [HOCHCO-Hty + H – CO], 114 [C<sub>5</sub>H<sub>12</sub>N<sub>3</sub>] (Agm), 107 [CH<sub>2</sub>PhOH], 84 MePro-immonium ion. 5

**Figure S4.** Enhanced ion product mass spectra of spumigin **15** (Hpla + 42)-Leu-Pro-Argal with [M + H] ion at  $m/z$  575 (*N. spumigena* B15a). The structure was elucidated mainly based on the mass signals at  $m/z$ : 557 [M + H – H<sub>2</sub>O], 515 [M + H – H<sub>2</sub>O – CH<sub>2</sub>N<sub>2</sub>] or/and [M + H – CH<sub>3</sub>COOH], 417 [(Hpla + 42)-Leu-Pro + H], 320 [(Hpla + 42)-Leu + H], 292 [(Hpla + 42)-Leu + H – CO], 239 [Pro-Argal + H – NH<sub>2</sub>], 221 [Pro-Argal + H – H<sub>2</sub>O – NH<sub>2</sub>], 142 [Argal + H – NH<sub>3</sub>], 100 [C<sub>4</sub>H<sub>10</sub>N<sub>3</sub>] Argal fragment, 86 Leu-immonium ion, 70 Pro-immonium ion. 6

**Figure S5.** Enhanced ion product mass spectra of spumigin **18** Hpla-Hty-Pro-OH with [M + H] ion at  $m/z$  457 (*N. spumigena* CCNP1403). The structure was elucidated mainly based on the mass signals at  $m/z$ : 439 [Hpla-Hty-Pro + H], 342 [Hpla-Hty + H], 314 [Hpla-Hty + H – CO], 208 [HOCHCO-Hty + H – CO], 107 [CH<sub>2</sub>PhOH], 70 Pro-immonium ion. 7

**Figure S6.** Enhanced ion product mass spectra of partially identified aeruginosin **19** with [M + H] ion at  $m/z$  603 (*N. spumigena* KAC66). The mass signals were assigned to the following fragments: 585 [M + H – H<sub>2</sub>O], 429 [M + H – Arg], 342 [Choi-Arg + H], 325 [Choi-Arg + H – NH<sub>2</sub>], 307 [Choi-Arg + H – H<sub>2</sub>O – NH<sub>3</sub>], 300 [Choi-Arg + H – CH<sub>2</sub>N<sub>2</sub>], 282 [Choi-Arg + H – H<sub>2</sub>O – CH<sub>2</sub>N<sub>2</sub>], 175 [Arg + H], 140 Choi-immonium ion, 122 Choi-immonium – H<sub>2</sub>O. 8

**Figure S7.** Enhanced ion product mass spectra of partially identified aeruginosin **22** with  $[M + H]$  ion at  $m/z$  559 (*N. spumigena* Node2). The mass signals were assigned to the following fragments: 541  $[M + H - H_2O]$ , 298  $[Choi-Agm + H]$ , 281  $[Choi-Agm + H - NH_2]$ , 256  $[Choi-Arg + H - CH_2N_2]$ , 238  $[Choi-Arg + H - H_2O - CH_2N_2]$ , 210  $[Choi-Arg + H - H_2O - CH_2N_2 - CO]$ , 140 Choi-immonium ion, 122 Choi-immonium  $- H_2O$ , 114  $[C_5H_{12}N_3]$  (Agm).

9

**Figure S8.** Enhanced ion product mass spectra of anabaenopeptin **25**

Phe-CO-[Lys-Val-Hty-MeHty-MetO] with  $[M + H]$  ion at  $m/z$  934 (*N. spumigena* bloom sample, 3 July 2012). The mass signals were assigned to the following fragments: 916  $[M + H - H_2O]$ , 906  $[M + H - CO]$ , 888  $[M + H - H_2O - CO]$ , 870  $[M + H - CH_3SOH]$  (from MetO), 787  $[M + H - MetO]$ , 769  $[M + H - Phe - 2H]$ , 757  $[M + H - Hty]$ , 705  $[M + H - Phe - 2H - CH_3SOH]$  (from MetO), 677  $[M + H - (CO-Phe) - 2H - CH_3SOH]$  (from MetO), 594  $[Val-(Lys-CO)-MetO-MeHty + H]$ , 511  $[MeHty-MeO-(Lys-CO) + H]$ , 447  $[MeHty-MeO-(Lys-CO) + H - CH_3SOH]$  (from MetO), 403  $[Lys-Val-Hty-H]$ , 369  $[MeHty-Hty + H]$ , 339  $[MetO-MeHty + H]$ , 164 MeHty, 107  $[CH_2PhOH]$ , 84 Lys-immonium ion.

10

**Figure S9.** Enhanced ion product mass spectra of anabaenopeptin **32**

Ile-CO-[Lys-MetO-Hph-MeHty-MetO] with  $[M + H]$  ion at  $m/z$  932 (*N. spumigena* CCNP1402). The mass signals were assigned to the following fragments: 914  $[M + H - H_2O]$ , 904  $[M + H - CO]$ , 886  $[M + H - H_2O - CO]$ , 868  $[M + H - CH_3SOH]$  (from MetO), 801  $[M + H - Ile - 2H]$ , 737  $[M + H - Ile - 2H - CH_3SOH]$  (from MetO), 511  $[MeHty-MeO-(Lys-CO) + H]$ , 447  $[MeHty-MeO-(Lys-CO) + H - CH_3SOH]$  (from MetO), 436  $[MeHy-Hph-MetO + H - CH_3SOH]$  (from MetO), 339  $[MeHty-MetO + H]$ , 164 MeHty, 107  $[CH_2PhOH]$ , 84 Lys-immonium ion.

11

**Figure S10.** Enhanced ion product mass spectra of anabaenopeptin **39**

Ile-CO-[Lys-Met-Hph-MeHph-AcSer] with  $[M + H]$  ion at  $m/z$  882 (*N. spumigena* BY1). The mass signals were assigned to the following fragments: 864  $[M + H - H_2O]$ , 854  $[M + H - CO]$ , 822  $[M + H - CH_3COOH]$  (from AcSer), 751  $[M + H - Ile - 2H]$ , 725  $[M + H - (CO-Ile)]$ , 723  $[M + H - (CO-Ile) - 2H]$ , 530  $[Met-(Lys-CO-Ile)-Met + H - H_2O]$ , 486  $[Met-(Lys-CO-Ile)-(AcSer) + H - CH_3COOH]$  (from AcSer), 477  $[MeHph-AcSer-(Lys-CO) + H]$ , 468  $[MeHph-Hph-Met + H]$ , 337  $[Hph-MeHph + H]$ , 84 Lys-immonium ion.

12

**Figure S11.** Enhanced ion product mass spectra of anabaenopeptin **41**

Ile-CO-[Lys-Ile-Hph-MeHty-AcSer] with  $[M + H]$  ion at  $m/z$  880 (*N. spumigena* Node2). The mass signals were assigned to the following fragments: 862  $[M + H - H_2O]$ , 852  $[M + H - CO]$ , 834  $[M + H - H_2O - CO]$ , 820  $[M + H - CH_3COOH]$  (from AcSer), 767  $[M + H - Ile]$ , 749  $[M + H - Ile - 2H]$ , 723  $[M + H - (CO + Ile)]$ , 719  $[M + H - Hph]$ , 606  $[MeHty-AcSer-(Lys-CO-Ile) + H]$ , 493  $[MeHty-AcSer-(Lys-CO) + H]$ , 164 MeHty, 107  $[CH_2PhOH]$ , 84 Lys-immonium ion.

13

**Figure S1.** Total ion current chromatograms of *N. spumigena* strains: NSBL-06 (A), NSBR-02 (B), CCNP1401 (C) and BY1 (D).

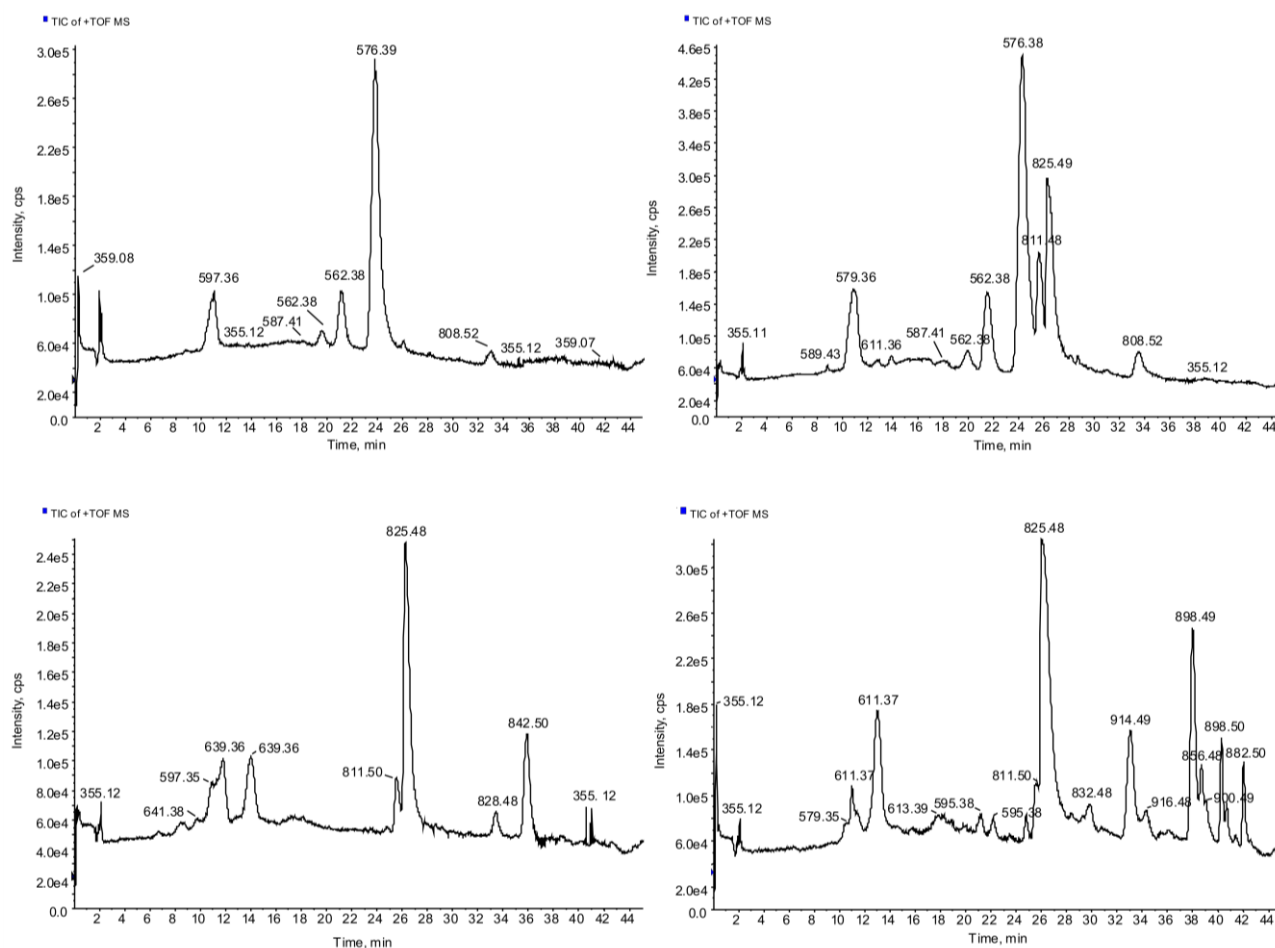

**Figure S2.** Enhanced ion product mass spectra of spumigin **12** Hpla-Tyr-Pro-Argal with  $[M + H]$  ion at  $m/z$  583 (*N. spumigena* 1403). The structure was elucidated mainly based on the mass signals at  $m/z$ : 565  $[M + H - H_2O]$ , 523  $[M + H - H_2O - CH_2N_2]$ , 425  $[Hpla-Tyr-Pro + H]$ , 300  $[Hpla-Tyr + H - CO]$ , 239  $[Pro-Argal + H - NH_2]$ , 221  $[Pro-Argal + H - H_2O - NH_2]$ , 142  $[Argal + H - NH_3]$ , 136 Tyr-immonium ion, 100  $[C_4H_{10}N_3]$  Argal fragment, 70 Pro-immonium ion.

Acq. Time: 10:19  
Acq. Date: Friday, December 03, 2010

Polarity/Scan Type: Positive Enhanced Product Ion

Acq. File: 20101202.wiff

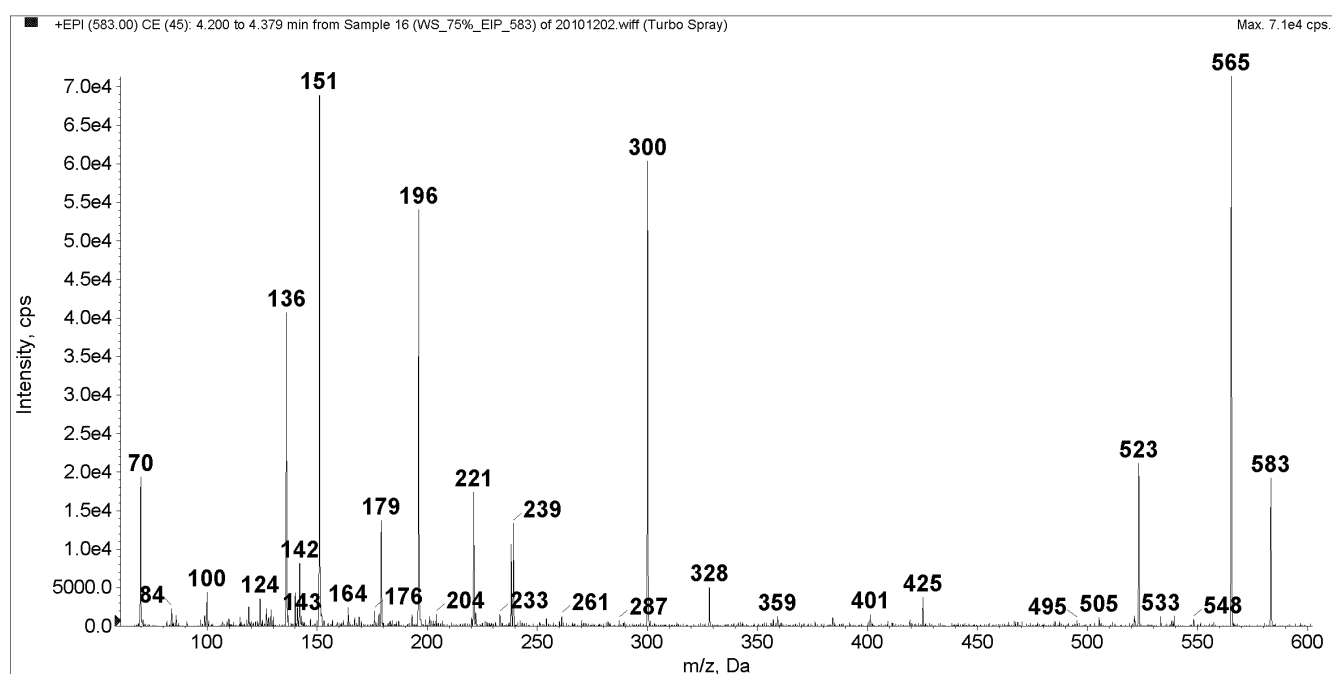

**Figure S3.** Enhanced ion product mass spectra of spumigin **13** Hpla-Hty-MePro-Agm with  $[M + H]$  ion at  $m/z$  583 (*N. spumigena* Nodh2). The structure was elucidated mainly based on the mass signals at  $m/z$ : 565  $[M + H - H_2O]$ , 541  $[M + H - CH_2N_2]$ , 523  $[M + H - H_2O - CH_2N_2]$ , 453  $[Hpla-Hty-MePro + H]$ , 342  $[Hpla-Hty + H]$ , 314  $[Hpla-Hyr + H - CO]$ , 225  $[MePro-Agm + H - NH_2]$ , 208  $[HOCHCO-Hty + H - CO]$ , 114  $[C_5H_{12}N_3]$  (Agm), 107  $[CH_2PhOH]$ , 84 MePro-immonium ion.

Acq. Time: 13:29  
Acq. Date: Friday, July 29, 2011

Polarity/Scan Type: Positive Enhanced Product Ion

Acq. File: 20110729.wiff

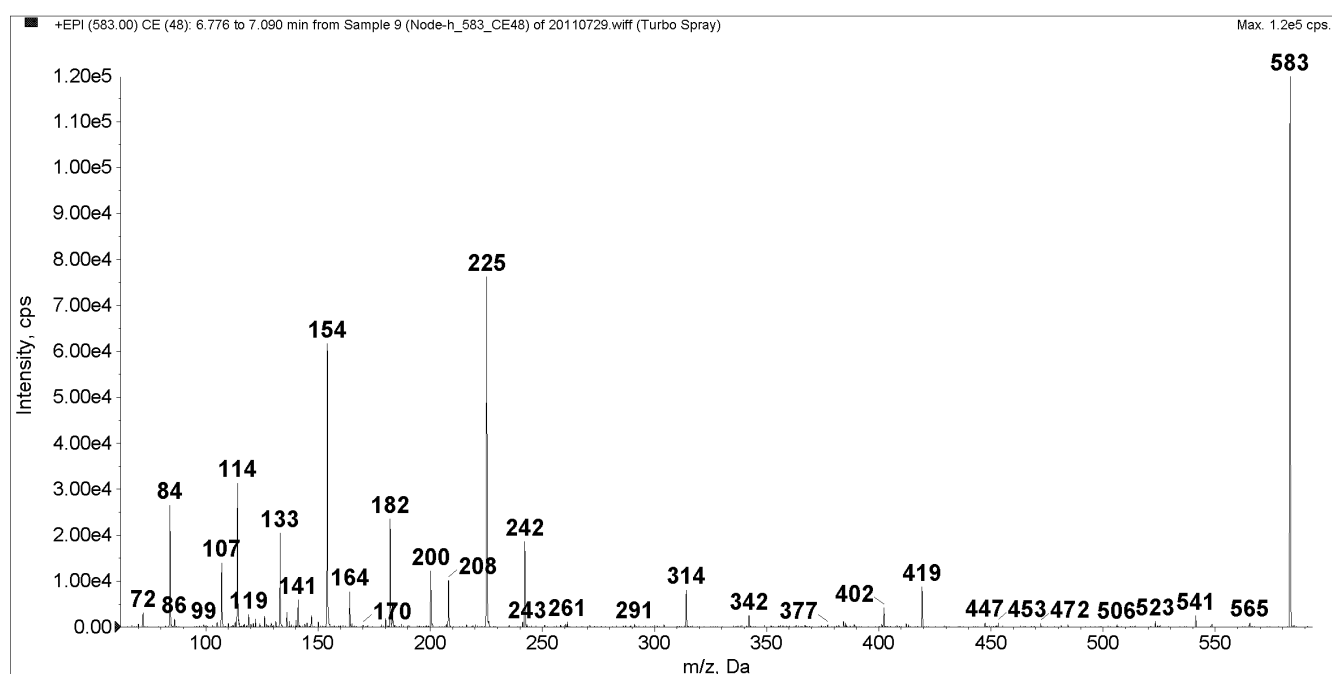

**Figure S4.** Enhanced ion product mass spectra of spumigin **15** (Hpla + 42)-Leu-Pro-Argal with  $[M + H]$  ion at  $m/z$  575 (*N. spumigena* B15a). The structure was elucidated mainly based on the mass signals at  $m/z$ : 557  $[M + H - H_2O]$ , 515  $[M + H - H_2O - CH_2N_2]$  or/and  $[M + H - CH_3COOH]$ , 417  $[(Hpla + 42)\text{-Leu-Pro} + H]$ , 320  $[(Hpla + 42)\text{-Leu} + H]$ , 292  $[(Hpla + 42)\text{-Leu} + H - CO]$ , 239  $[\text{Pro-Argal} + H - NH_2]$ , 221  $[\text{Pro-Argal} + H - H_2O - NH_2]$ , 142  $[\text{Argal} + H - NH_3]$ , 100  $[C_4H_{10}N_3]$  Argal fragment, 86 Leu-immonium ion, 70 Pro-immonium ion.

Acq. Time: 15:31  
Acq. Date: Tuesday, March 09, 2010

Polarity/Scan Type: Positive Enhanced Product Ion

Acq. File: 20100309.wiff

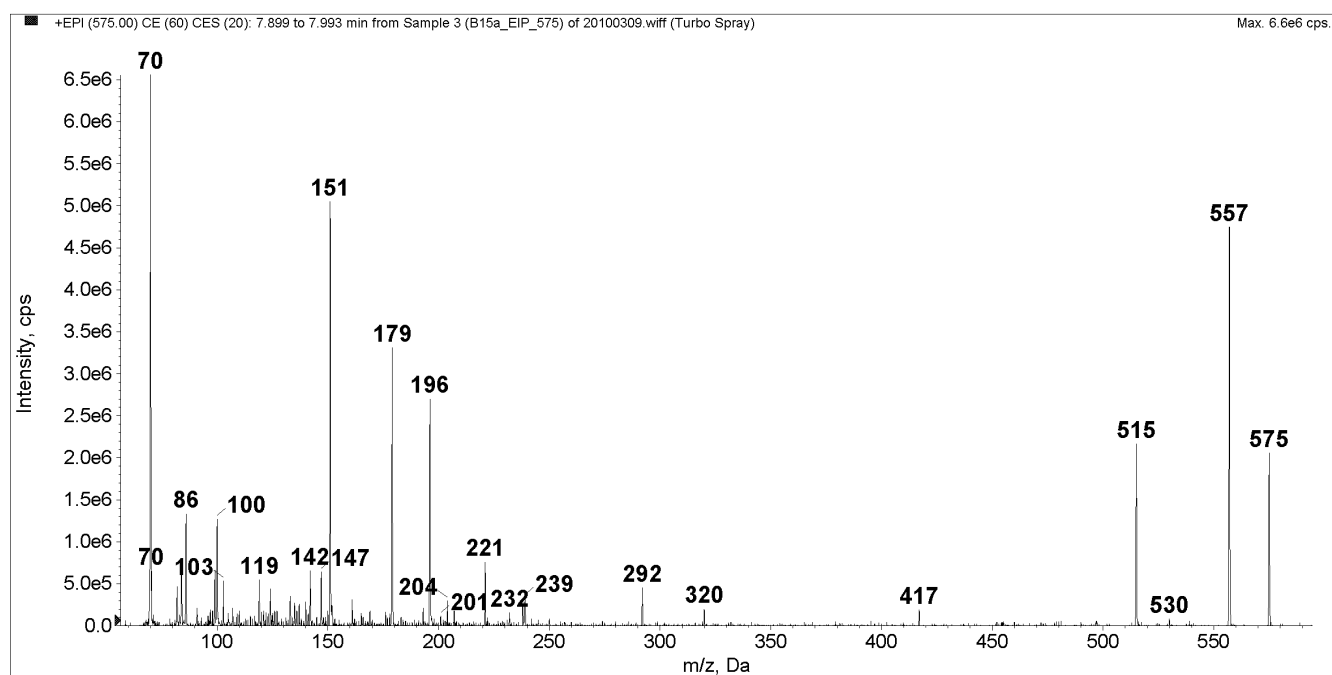

**Figure S5.** Enhanced ion product mass spectra of spumigin **18** Hpla-Hty-Pro-OH with  $[M + H]$  ion at  $m/z$  457 (*N. spumigena* CCNP1403). The structure was elucidated mainly based on the mass signals at  $m/z$ : 439 [Hpla-Hty-Pro + H], 342 [Hpla-Hty + H], 314 [Hpla-Hyr + H - CO], 208 [HOCHCO-Hty + H - CO], 107 [CH<sub>2</sub>PhOH], 70 Pro-immonium ion.

Acq. Time: 13:06  
Acq. Date: Thursday, December 02, 2010

Polarity/Scan Type: Positive Enhanced Product Ion

Acq. File: 20101202.wiff

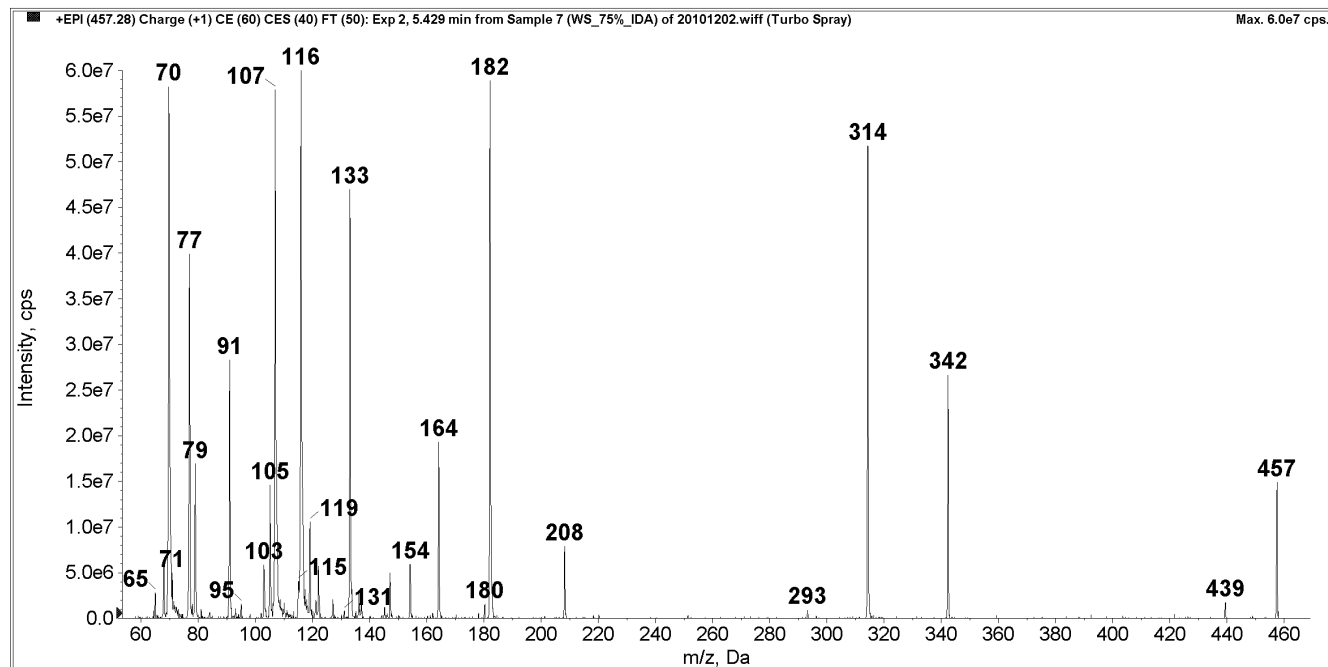

**Figure S6.** Enhanced ion product mass spectra of partially identified aeruginosin **19** with  $[M + H]$  ion at  $m/z$  603 (*N. spumigena* KAC66). The mass signals were assigned to the following fragments: 585  $[M + H - H_2O]$ , 429  $[M + H - Arg]$ , 342  $[Choi-Arg + H]$ , 325  $[Choi-Arg + H - NH_2]$ , 307  $[Choi-Arg + H - H_2O - NH_3]$ , 300  $[Choi-Arg + H - CH_2N_2]$ , 282  $[Choi-Arg + H - H_2O - CH_2N_2]$ , 175  $[Arg + H]$ , 140 Choi-immonium ion, 122 Choi-immonium  $- H_2O$ .

Acq. Time: 09:17  
Acq. Date: Friday, March 19, 2010

Polarity/Scan Type: Positive Enhanced Product Ion

Acq. File: 20100319SET1.wiff

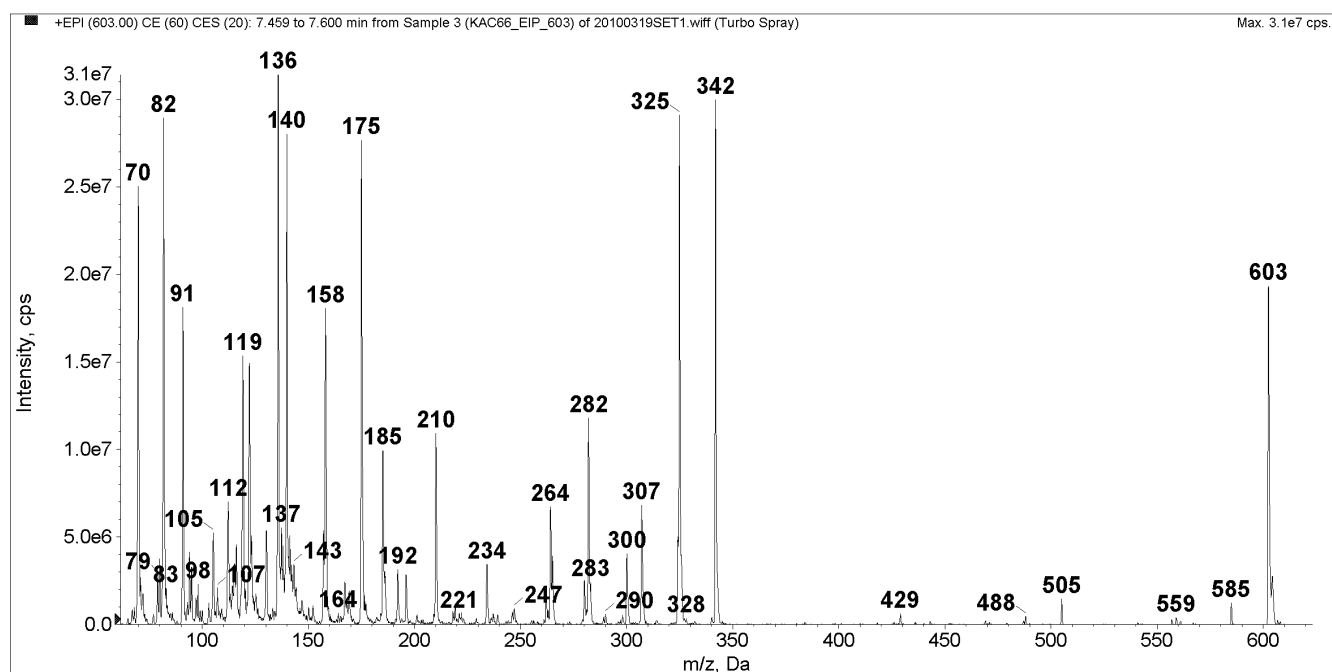

**Figure S7.** Enhanced ion product mass spectra of partially identified aeruginosin **22** with  $[M + H]$  ion at  $m/z$  559 (*N. spumigena* Node2). The mass signals were assigned to the following fragments: 541  $[M + H - H_2O]$ , 298 [Choi-Agm + H], 281 [Choi-Agm + H -  $NH_2$ ], 256 [Choi-Arg + H -  $CH_2N_2$ ], 238 [Choi-Arg + H -  $H_2O - CH_2N_2$ ], 210 [Choi-Arg + H -  $H_2O - CH_2N_2 - CO$ ], 140 Choi-immonium ion, 122 Choi-immonium -  $H_2O$ , 114  $[C_5H_{12}N_3]$  (Agm).

Acq. Time: 11:10  
Acq. Date: Monday, August 22, 2011

Polarity/Scan Type: Positive Enhanced Product Ion

Acq. File: 20110822.wiff

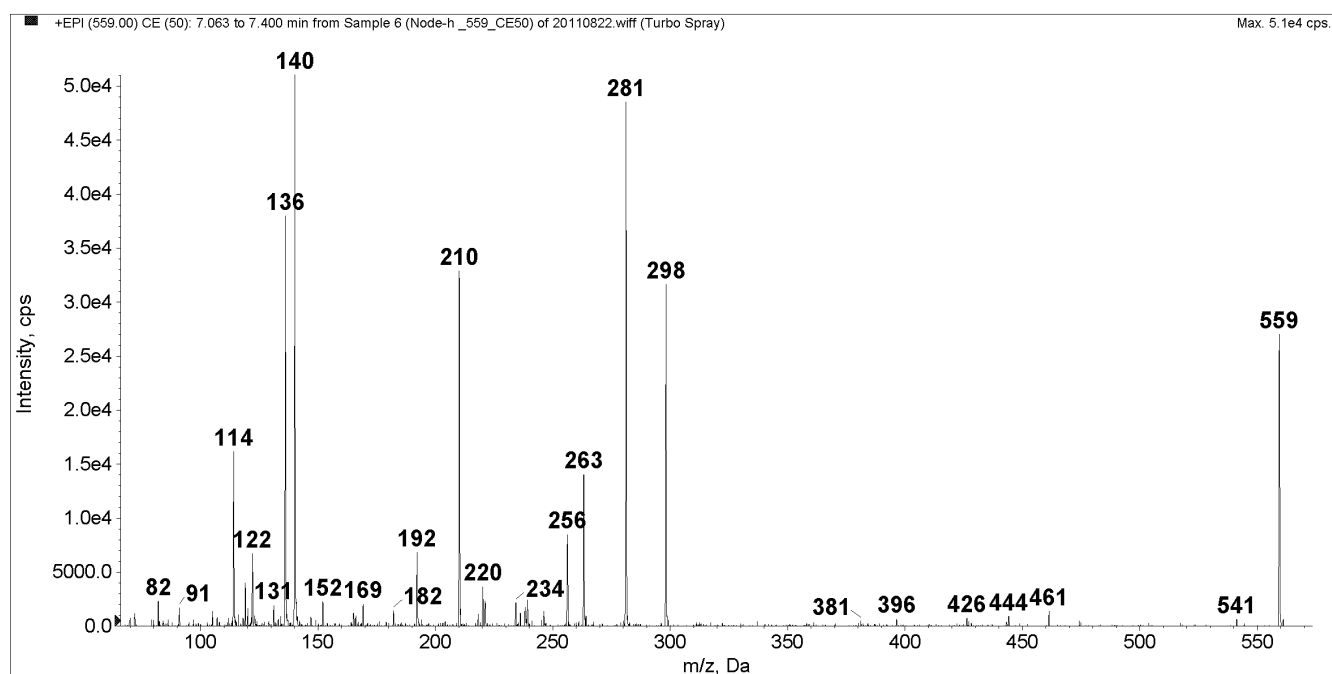

**Figure S8.** Enhanced ion product mass spectra of anabaenopeptin **25** Phe-CO-[Lys-Val-Hty-MeHty-MetO] with [M + H] ion at  $m/z$  934 (*N. spumigena* bloom sample, 3 July 2012). The mass signals were assigned to the following fragments: 916 [M + H - H<sub>2</sub>O], 906 [M + H - CO], 888 [M + H - H<sub>2</sub>O - CO], 870 [M + H - CH<sub>3</sub>SOH (from MetO)], 787 [M + H - MetO], 769 [M + H - Phe - 2H], 757 [M + H - Hty], 705 [M + H - Phe - 2H - CH<sub>3</sub>SOH (from MetO)], 677 [M + H - (CO-Phe) - 2H - CH<sub>3</sub>SOH (from MetO)], 594 [Val-(Lys-CO)-MetO-MeHty + H], 511 [MeHty-MeO-(Lys-CO) + H], 447 [MeHty-MeO-(Lys-CO) + H - CH<sub>3</sub>SOH (from MetO)], 403 [Lys-Val-Hty-H], 369 [MeHty-Hty + H], 339 [MetO-MeHty + H], 164 MeHty, 107 [CH<sub>2</sub>PhOH], 84 Lys-immonium ion.

Acq. Time: 09:43  
Acq. Date: Wednesday, July 11, 2012

Polarity/Scan Type: Positive Enhanced Product Ion

Acq. File: 20120711.wiff

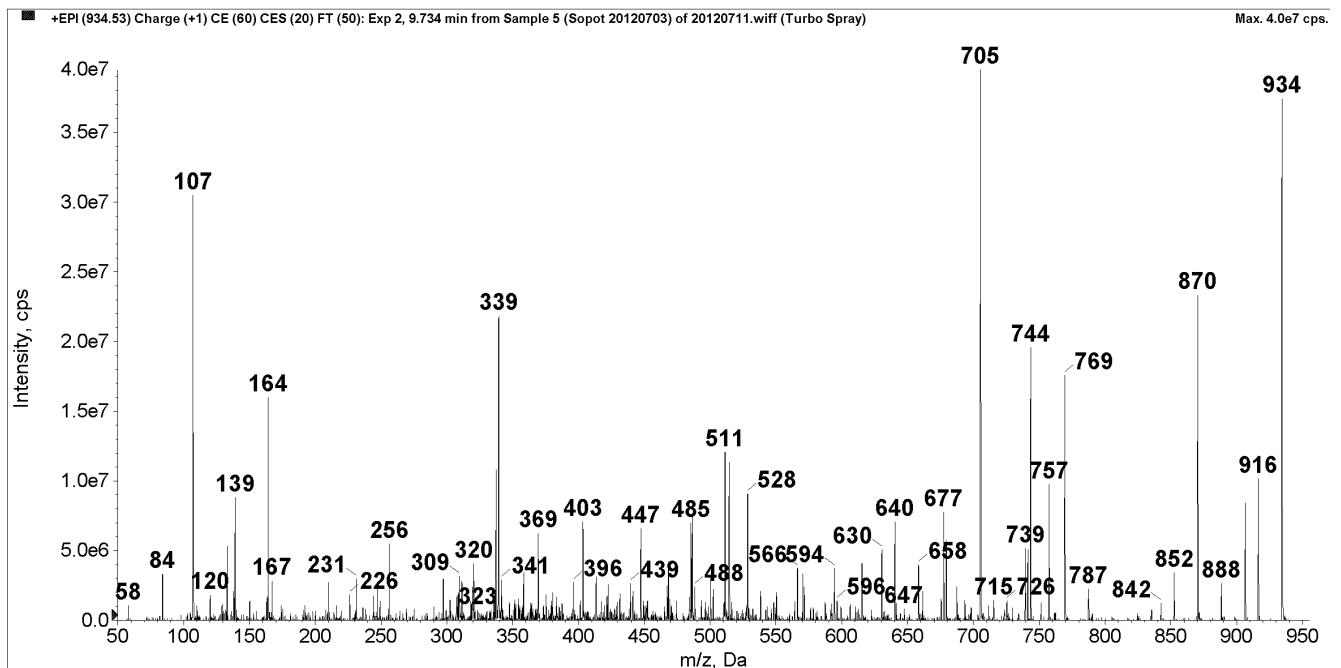

**Figure S9.** Enhanced ion product mass spectra of anabaenopeptin **32** Ile-CO-[Lys-MetO-Hph-MeHty-MetO] with  $[M + H]$  ion at  $m/z$  932 (*N. spumigena* CCNP1402). The mass signals were assigned to the following fragments: 914  $[M + H - H_2O]$ , 904  $[M + H - CO]$ , 886  $[M + H - H_2O - CO]$ , 868  $[M + H - CH_3SOH$  (from MetO)], 801  $[M + H - Ile - 2H]$ , 737  $[M + H - Ile - 2H - CH_3SOH$  (from MetO)], 511  $[MeHty-MeO-(Lys-CO) + H]$ , 447  $[MeHty-MeO-(Lys-CO) + H - CH_3SOH$  (from MetO)], 436  $[MeHy-Hph-MetO + H - CH_3SOH$  (from MetO)], 339  $[MeHty-MetO + H]$ , 164 MeHty, 107  $[CH_2PhOH]$ , 84 Lys-immonium ion.

Acq. Time: 11:15  
Acq. Date: Thursday, January 26, 2012

Polarity/Scan Type: Positive Enhanced Product Ion

Acq. File: 20120126.wiff

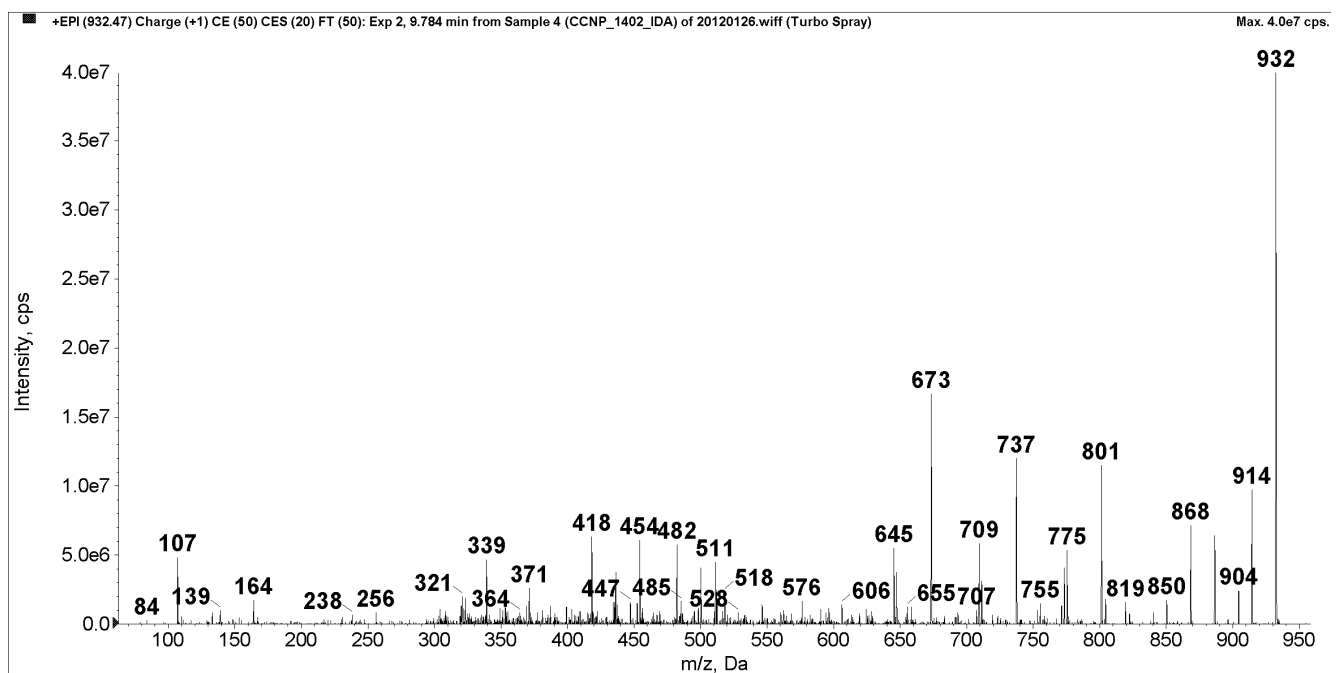

**Figure S10.** Enhanced ion product mass spectra of anabaenopeptin **39** Ile-CO-[Lys-Met-Hph-MeHph-AcSer] with  $[M + H]$  ion at  $m/z$  882 (*N. spumigena* BY1). The mass signals were assigned to the following fragments: 864  $[M + H - H_2O]$ , 854  $[M + H - CO]$ , 822  $[M + H - CH_3COOH$  (from AcSer)], 751  $[M + H - Ile - 2H]$ , 725  $[M + H - (CO-Ile)]$ , 723  $[M + H - (CO-Ile) - 2H]$ , 530  $[Met-(Lys-CO-Ile)-Met + H - H_2O]$ , 486  $[Met-(Lys-CO-Ile)-(AcSer) + H - CH_3COOH$  (from AcSer)], 477  $[MeHph-AcSer-(Lys-CO) + H]$ , 468  $[MeHph-Hph-Met + H]$ , 337  $[Hph-MeHph + H]$ , 84 Lys-immonium ion.

Acq. Time: 13:01  
Acq. Date: Wednesday, February 15, 2012

Polarity/Scan Type: Positive Enhanced Product Ion

Acq. File: 20120215.wiff

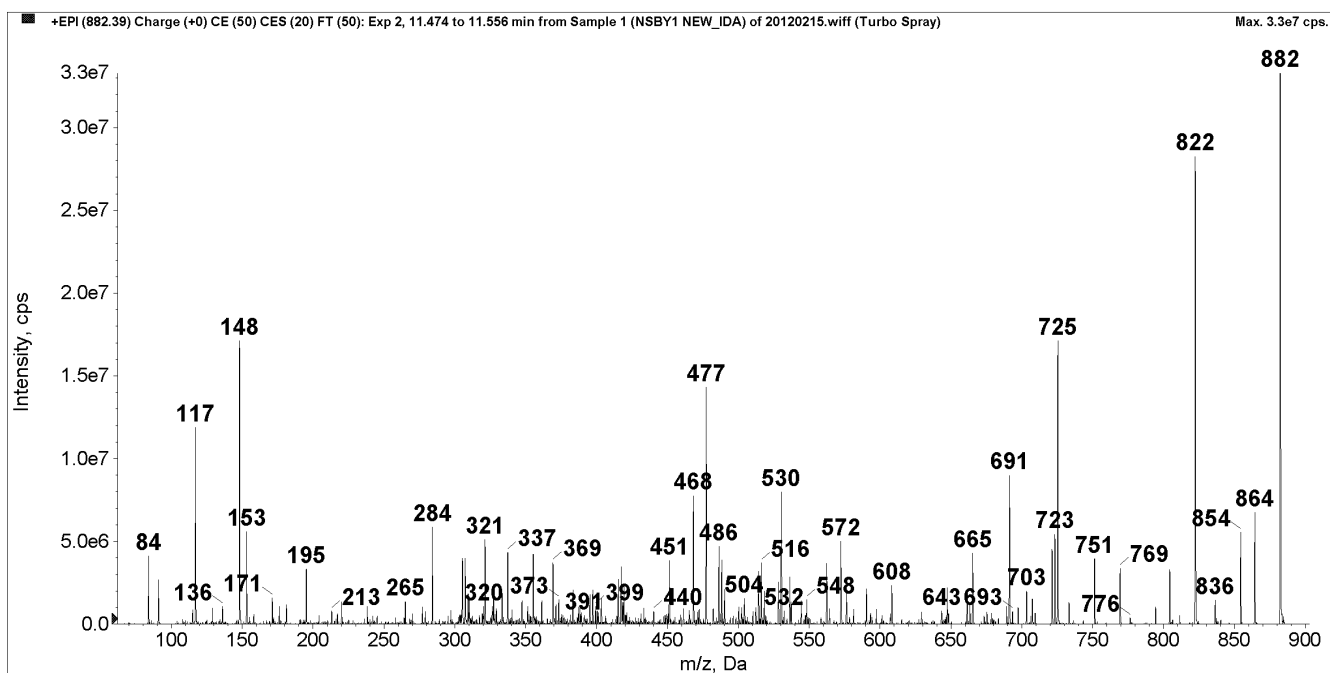

**Figure S11.** Enhanced ion product mass spectra of anabaenopeptin **41** Ile-CO-[Lys-Ile-Hph-MeHty-AcSer] with [M + H] ion at  $m/z$  880 (*N. spumigena* Node2). The mass signals were assigned to the following fragments: 862 [M + H - H<sub>2</sub>O], 852 [M + H - CO], 834 [M + H - H<sub>2</sub>O - CO], 820 [M + H - CH<sub>3</sub>COOH (from AcSer)], 767 [M + H - Ile], 749 [M + H - Ile - 2H], 723 [M + H - (CO + Ile)], 719 [M + H - Hph], 606 [MeHty-AcSer-(Lys-CO-Ile) + H], 493 [MeHty-AcSer-(Lys-CO) + H], 164 MeHty, 107 [CH<sub>2</sub>PhOH], 84 Lys-immonium ion.

Acq. Time: 12:53  
Acq. Date: Thursday, January 26, 2012

Polarity/Scan Type: Positive Enhanced Product Ion

Acq. File: 20120126.wiff

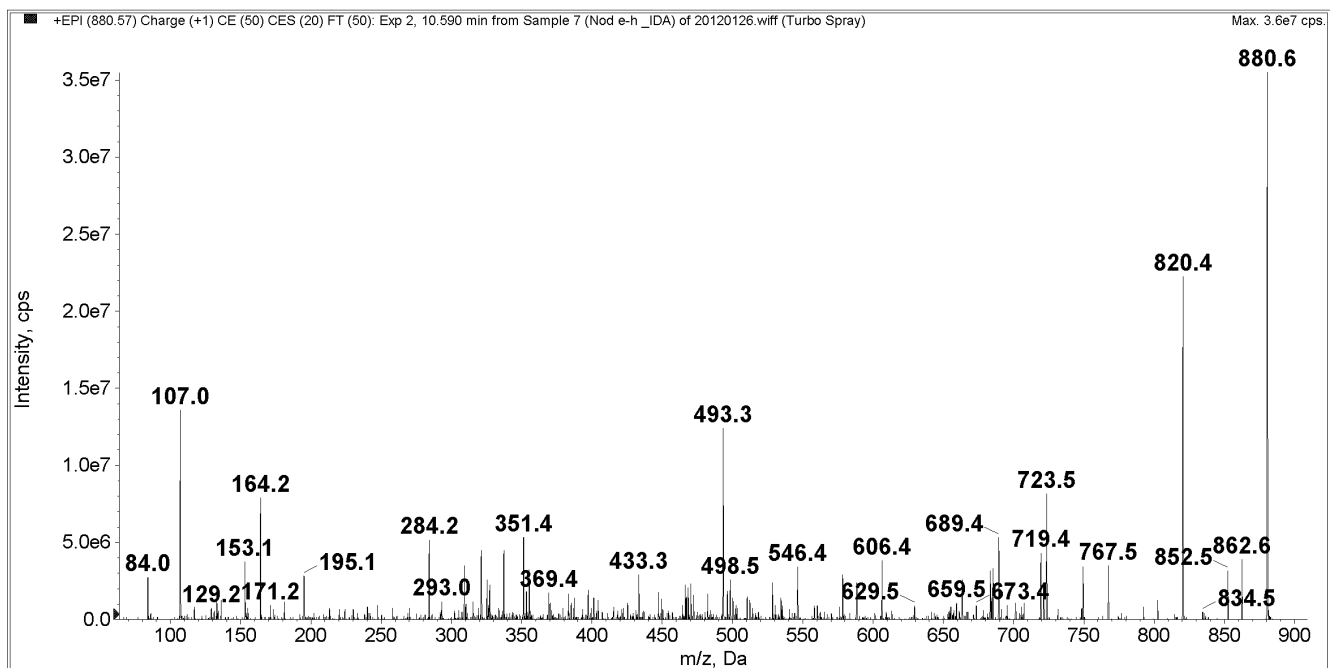

Supplement: Supplementary File 1 — Supplementary Information (PDF, 471 KB) [file marinedrugs-11-00001-s001.pdf]
