# Supplementary material for: Diversity of Peptides Produced by Nodularia spumigena from Various Geographical Regions
Source: MDPI journal article supplement (doi:10.3390/md11010001), 2012-12-21
Supplement: s2 [file s2]

marinedrugs-11-00001-s001.mol
  corina  07071423013D 1   1.00000     0.00000 
CORINA 3.49 0023  12.04.2013
 46 48  0  0  0  0  0  0  0  0999 V2000
   -0.0179    1.4660    0.0101 N   0  0  0  0  0  0  0  0  0  0  0  0
    0.0021   -0.0041    0.0020 C   0  0  0  0  0  0  0  0  0  0  0  0
    1.0665    2.2663    0.0040 C   0  0  0  0  0  0  0  0  0  0  0  0
    2.1781    1.7813   -0.0092 O   0  0  0  0  0  0  0  0  0  0  0  0
    1.1303    0.2689    2.0568 O   0  0  0  0  0  0  0  0  0  0  0  0
    0.6932   -0.5141    1.2403 C   0  0  0  0  0  0  0  0  0  0  0  0
   -1.4652   -0.4821   -0.0147 C   0  0  0  0  0  0  0  0  0  0  0  0
   -2.2238    0.7447   -0.5863 C   0  0  0  0  0  0  0  0  0  0  0  0
   -1.4205    1.9197    0.0195 C   0  0  0  0  0  0  0  0  0  0  0  0
    2.9858   -2.3691    2.4111 C   0  0  0  0  0  0  0  0  0  0  0  0
    1.4973   -2.3361    2.6441 C   0  0  0  0  0  0  0  0  0  0  0  0
    0.8255   -1.8403    1.4403 N   0  0  0  0  0  0  0  0  0  0  0  0
    3.4387   -2.0149    1.3492 O   0  0  0  0  0  0  0  0  0  0  0  0
   -0.4871   -3.6955    3.3198 C   0  0  0  0  0  0  0  0  0  0  0  0
    0.9994   -3.7476    2.9613 C   0  0  0  0  0  0  0  0  0  0  0  0
   -2.4083   -5.0572    3.9803 N   0  0  0  0  0  0  0  0  0  0  0  0
   -0.9850   -5.1070    3.6370 C   0  0  0  0  0  0  0  0  0  0  0  0
   -4.4140   -6.1663    4.6267 N   0  0  0  0  0  0  0  0  0  0  0  0
   -3.0782   -6.2132    4.3045 C   0  0  0  0  0  0  0  0  0  0  0  0
   -2.4469   -7.3535    4.3065 N   0  0  0  0  0  0  0  0  0  0  0  0
    0.8979    3.7638    0.0137 C   0  0  0  0  0  0  0  0  0  0  0  0
    0.1361    4.1831    1.2725 C   0  0  0  0  0  0  0  0  0  0  0  0
   -0.1442    5.6864    1.2220 C   0  0  0  0  0  0  0  0  0  0  0  0
   -0.8946    6.0994    2.4619 C   0  0  0  0  0  0  0  0  0  0  0  0
   -0.1995    6.5010    3.5876 C   0  0  0  0  0  0  0  0  0  0  0  0
   -0.8851    6.8855    4.7236 C   0  0  0  0  0  0  0  0  0  0  0  0
   -2.2723    6.8685    4.7343 C   0  0  0  0  0  0  0  0  0  0  0  0
   -2.9674    6.4651    3.6035 C   0  0  0  0  0  0  0  0  0  0  0  0
   -2.2771    6.0815    2.4700 C   0  0  0  0  0  0  0  0  0  0  0  0
   -2.9490    7.2459    5.8507 O   0  0  0  0  0  0  0  0  0  0  0  0
    2.2157    4.4037    0.0046 N   0  0  0  0  0  0  0  0  0  0  0  0
    2.3552    5.6523   -0.4834 C   0  0  0  0  0  0  0  0  0  0  0  0
    3.7108    6.3105   -0.4928 C   0  0  0  0  0  0  0  0  0  0  0  0
    3.6219    7.5921   -1.1696 O   0  0  0  0  0  0  0  0  0  0  0  0
    4.1834    6.5255    0.9464 C   0  0  0  0  0  0  0  0  0  0  0  0
    5.5885    7.0701    0.9377 C   0  0  0  0  0  0  0  0  0  0  0  0
    5.7990    8.4364    0.9091 C   0  0  0  0  0  0  0  0  0  0  0  0
    6.6650    6.2029    0.9642 C   0  0  0  0  0  0  0  0  0  0  0  0
    7.9540    6.6997    0.9621 C   0  0  0  0  0  0  0  0  0  0  0  0
    8.1678    8.0702    0.9333 C   0  0  0  0  0  0  0  0  0  0  0  0
    7.0860    8.9383    0.9064 C   0  0  0  0  0  0  0  0  0  0  0  0
    3.8359    7.5975   -2.4947 C   0  0  0  0  0  0  0  0  0  0  0  0
    3.7603    8.8907   -3.2648 C   0  0  0  0  0  0  0  0  0  0  0  0
    4.0891    6.5657   -3.0700 O   0  0  0  0  0  0  0  0  0  0  0  0
    9.4349    8.5614    0.9316 O   0  0  0  0  0  0  0  0  0  0  0  0
    1.3898    6.2461   -0.9149 O   0  0  0  0  0  0  0  0  0  0  0  0
  1  2  1  0      
  1  3  1  0      
  3  4  2  0      
  5  6  2  0      
  6  2  1  0      
  2  7  1  0      
  7  8  1  0      
  8  9  1  0      
  9  1  1  0      
 10 11  1  0      
 11 12  1  0      
 12  6  1  0      
 10 13  2  0      
 14 15  1  0      
 15 11  1  0      
 16 17  1  0      
 17 14  1  0      
 18 19  1  0      
 19 16  1  0      
 19 20  2  0      
  3 21  1  0      
 21 22  1  0      
 22 23  1  0      
 24 25  2  0      
 25 26  1  0      
 26 27  2  0      
 27 28  1  0      
 28 29  2  0      
 29 24  1  0      
 24 23  1  0      
 27 30  1  0      
 21 31  1  0      
 31 32  1  0      
 32 33  1  0      
 33 34  1  0      
 33 35  1  0      
 36 37  1  0      
 36 38  2  0      
 38 39  1  0      
 39 40  2  0      
 40 41  1  0      
 41 37  2  0      
 34 42  1  0      
 42 43  1  0      
 42 44  2  0      
 40 45  1  0      
 32 46  2  0      
 35 36  1  0      
M  END
$$$$
