# Supplementary material for: Diversity of Peptides Produced by Nodularia spumigena from Various Geographical Regions
Source: MDPI journal article supplement (doi:10.3390/md11010001), 2012-12-21
Supplement: s3 [file s3]

marinedrugs-11-00001-s001.mol
  ChemDraw06021422222D

 46 48  0  0  0  0  0  0  0  0999 V2000
   -0.2495    0.4338    0.0000 N   0  0  0  0  0  0  0  0  0  0  0  0
    0.5755    0.4338    0.0000 C   0  0  0  0  0  0  0  0  0  0  0  0
   -0.6620   -0.2807    0.0000 C   0  0  0  0  0  0  0  0  0  0  0  0
   -0.2495   -0.9952    0.0000 O   0  0  0  0  0  0  0  0  0  0  0  0
    0.5755   -0.9952    0.0000 O   0  0  0  0  0  0  0  0  0  0  0  0
    0.9880   -0.2807    0.0000 C   0  0  0  0  0  0  0  0  0  0  0  0
    0.8304    1.2184    0.0000 C   0  0  0  0  0  0  0  0  0  0  0  0
    0.1630    1.7033    0.0000 C   0  0  0  0  0  0  0  0  0  0  0  0
   -0.5045    1.2184    0.0000 C   0  0  0  0  0  0  0  0  0  0  0  0
    1.8130   -1.7096    0.0000 C   0  0  0  0  0  0  0  0  0  0  0  0
    2.2255   -0.9952    0.0000 C   0  0  0  0  0  0  0  0  0  0  0  0
    1.8130   -0.2807    0.0000 N   0  0  0  0  0  0  0  0  0  0  0  0
    2.2255   -2.4241    0.0000 O   0  0  0  0  0  0  0  0  0  0  0  0
    3.4630   -1.7096    0.0000 C   0  0  0  0  0  0  0  0  0  0  0  0
    3.0505   -0.9952    0.0000 C   0  0  0  0  0  0  0  0  0  0  0  0
    4.7005   -2.4241    0.0000 N   0  0  0  0  0  0  0  0  0  0  0  0
    4.2880   -1.7096    0.0000 C   0  0  0  0  0  0  0  0  0  0  0  0
    5.9380   -3.1386    0.0000 N   0  0  0  0  0  0  0  0  0  0  0  0
    5.5255   -2.4241    0.0000 C   0  0  0  0  0  0  0  0  0  0  0  0
    5.9380   -1.7096    0.0000 N   0  0  0  0  0  0  0  0  0  0  0  0
   -1.4589   -0.0672    0.0000 C   0  0  0  0  0  0  0  0  0  0  0  0
   -1.6933    0.7225    0.0000 C   0  0  0  0  0  0  0  0  0  0  0  0
   -1.0891    1.3131    0.0000 C   0  0  0  0  0  0  0  0  0  0  0  0
   -1.5573    1.9771    0.0000 C   0  0  0  0  0  0  0  0  0  0  0  0
   -1.0916    2.6581    0.0000 C   0  0  0  0  0  0  0  0  0  0  0  0
   -1.4486    3.4019    0.0000 C   0  0  0  0  0  0  0  0  0  0  0  0
   -2.2712    3.4647    0.0000 C   0  0  0  0  0  0  0  0  0  0  0  0
   -2.7368    2.7837    0.0000 C   0  0  0  0  0  0  0  0  0  0  0  0
   -2.3799    2.0399    0.0000 C   0  0  0  0  0  0  0  0  0  0  0  0
   -2.6837    4.1792    0.0000 O   0  0  0  0  0  0  0  0  0  0  0  0
   -1.8714   -0.7817    0.0000 N   0  0  0  0  0  0  0  0  0  0  0  0
   -2.6964   -0.7817    0.0000 C   0  0  0  0  0  0  0  0  0  0  0  0
   -3.1089   -1.4961    0.0000 C   0  0  0  0  0  0  0  0  0  0  0  0
   -2.6964   -2.2106    0.0000 O   0  0  0  0  0  0  0  0  0  0  0  0
   -3.9339   -1.4961    0.0000 C   0  0  0  0  0  0  0  0  0  0  0  0
   -4.3923   -2.2462    0.0000 C   0  0  0  0  0  0  0  0  0  0  0  0
   -4.0919   -3.0145    0.0000 C   0  0  0  0  0  0  0  0  0  0  0  0
   -5.2080   -2.1221    0.0000 C   0  0  0  0  0  0  0  0  0  0  0  0
   -5.7232   -2.7665    0.0000 C   0  0  0  0  0  0  0  0  0  0  0  0
   -5.4228   -3.5349    0.0000 C   0  0  0  0  0  0  0  0  0  0  0  0
   -4.6071   -3.6589    0.0000 C   0  0  0  0  0  0  0  0  0  0  0  0
   -2.6964   -3.0356    0.0000 C   0  0  0  0  0  0  0  0  0  0  0  0
   -1.9820   -3.4481    0.0000 C   0  0  0  0  0  0  0  0  0  0  0  0
   -3.4109   -3.4481    0.0000 O   0  0  0  0  0  0  0  0  0  0  0  0
   -5.9380   -4.1792    0.0000 O   0  0  0  0  0  0  0  0  0  0  0  0
   -3.1089   -0.0672    0.0000 O   0  0  0  0  0  0  0  0  0  0  0  0
  1  2  1  0      
  1  3  1  0      
  3  4  2  0      
  5  6  2  0      
  6  2  1  0      
  2  7  1  0      
  7  8  1  0      
  8  9  1  0      
  9  1  1  0      
 10 11  1  0      
 11 12  1  0      
 12  6  1  0      
 10 13  2  0      
 14 15  1  0      
 15 11  1  0      
 16 17  1  0      
 17 14  1  0      
 18 19  1  0      
 19 16  1  0      
 19 20  2  0      
  3 21  1  0      
 21 22  1  0      
 22 23  1  0      
 24 25  2  0      
 25 26  1  0      
 26 27  2  0      
 27 28  1  0      
 28 29  2  0      
 29 24  1  0      
 24 23  1  0      
 27 30  1  0      
 21 31  1  0      
 31 32  1  0      
 32 33  1  0      
 33 34  1  0      
 33 35  1  0      
 36 37  1  0      
 36 38  2  0      
 38 39  1  0      
 39 40  2  0      
 40 41  1  0      
 41 37  2  0      
 34 42  1  0      
 42 43  1  0      
 42 44  2  0      
 40 45  1  0      
 32 46  2  0      
 35 36  1  0      
M  END
