# Supplementary material for: Diversity of Peptides Produced by Nodularia spumigena from Various Geographical Regions
Source: MDPI journal article supplement (doi:10.3390/md11010001), 2012-12-21
Supplement: s4 [file s4]

marinedrugs-11-00001-s002.mol
  corina  07071423013D 1   1.00000     0.00000 
CORINA 3.49 0023  12.04.2013
 24 25  0  0  0  0  0  0  0  0999 V2000
   -0.8723    0.3099   -0.5740 C   0  0  0  0  0  0  0  0  0  0  0  0
   -0.2706   -1.0995   -0.4463 C   0  0  0  0  0  0  0  0  0  0  0  0
    0.4424   -1.1669    0.8880 C   0  0  0  0  0  0  0  0  0  0  0  0
    1.6193   -0.1547    0.8436 C   0  0  0  0  0  0  0  0  0  0  0  0
    1.0040    1.2343    0.8522 C   0  0  0  0  0  0  0  0  0  0  0  0
    0.2017    1.3865   -0.4500 C   0  0  0  0  0  0  0  0  0  0  0  0
    1.0740   -2.4289    1.2551 N   0  0  0  0  0  0  0  0  0  0  0  0
    2.2483   -2.0966    2.1033 C   0  0  0  0  0  0  0  0  0  0  0  0
    2.3682   -0.5480    2.1262 C   0  0  0  0  0  0  0  0  0  0  0  0
    2.0352   -2.6159    3.5019 C   0  0  0  0  0  0  0  0  0  0  0  0
    0.9863   -2.4059    4.0734 O   0  0  0  0  0  0  0  0  0  0  0  0
    3.1464   -2.7396    6.4714 C   0  0  0  0  0  0  0  0  0  0  0  0
    2.8029   -3.8187    5.4770 C   0  0  0  0  0  0  0  0  0  0  0  0
    3.0101   -3.3138    4.1175 N   0  0  0  0  0  0  0  0  0  0  0  0
    3.5252   -1.6603    6.0843 O   0  0  0  0  0  0  0  0  0  0  0  0
    3.2713   -6.1739    4.7872 C   0  0  0  0  0  0  0  0  0  0  0  0
    3.7021   -5.0340    5.7123 C   0  0  0  0  0  0  0  0  0  0  0  0
    3.7579   -8.4807    4.1366 N   0  0  0  0  0  0  0  0  0  0  0  0
    4.1704   -7.3892    5.0225 C   0  0  0  0  0  0  0  0  0  0  0  0
    5.4794   -9.8598    5.0341 N   0  0  0  0  0  0  0  0  0  0  0  0
    4.4250   -9.6824    4.1697 C   0  0  0  0  0  0  0  0  0  0  0  0
   -0.0204   -3.4410    2.0930 X   0  0  0  0  0  0  0  0  0  0  0  0
   -1.5118    0.4318   -1.8461 O   0  0  0  0  0  0  0  0  0  0  0  0
    4.0580  -10.6535    3.3816 N   0  0  0  0  0  0  0  0  0  0  0  0
  1  2  1  0      
  2  3  1  0      
  3  4  1  0      
  4  5  1  0      
  5  6  1  0      
  6  1  1  0      
  3  7  1  0      
  7  8  1  0      
  8  9  1  0      
  9  4  1  0      
 10 11  2  0      
 12 13  1  0      
 13 14  1  0      
 14 10  1  0      
  8 10  1  0      
 12 15  2  0      
 16 17  1  0      
 17 13  1  0      
 18 19  1  0      
 19 16  1  0      
 20 21  1  0      
 21 18  1  0      
  7 22  1  0      
  1 23  1  0      
 21 24  2  0      
M  END
$$$$
