# Supplementary material for: Diversity of Peptides Produced by Nodularia spumigena from Various Geographical Regions
Source: MDPI journal article supplement (doi:10.3390/md11010001), 2012-12-21
Supplement: s5 [file s5]

marinedrugs-11-00001-s002.mol
  ChemDraw06021422222D

 24 25  0  0  0  0  0  0  0  0999 V2000
   -3.6094    1.8921    0.0000 C   0  0  0  0  0  0  0  0  0  0  0  0
   -3.6094    1.0671    0.0000 C   0  0  0  0  0  0  0  0  0  0  0  0
   -2.8949    0.6546    0.0000 C   0  0  0  0  0  0  0  0  0  0  0  0
   -2.1804    1.0671    0.0000 C   0  0  0  0  0  0  0  0  0  0  0  0
   -2.1804    1.8921    0.0000 C   0  0  0  0  0  0  0  0  0  0  0  0
   -2.8949    2.3046    0.0000 C   0  0  0  0  0  0  0  0  0  0  0  0
   -2.7234   -0.1524    0.0000 N   0  0  0  0  0  0  0  0  0  0  0  0
   -1.9029   -0.2386    0.0000 C   0  0  0  0  0  0  0  0  0  0  0  0
   -1.5673    0.5150    0.0000 C   0  0  0  0  0  0  0  0  0  0  0  0
   -1.2115   -0.6153    0.0000 C   0  0  0  0  0  0  0  0  0  0  0  0
   -1.3842   -1.4220    0.0000 O   0  0  0  0  0  0  0  0  0  0  0  0
    0.0131   -1.7212    0.0000 C   0  0  0  0  0  0  0  0  0  0  0  0
    0.1576   -0.9335    0.0000 C   0  0  0  0  0  0  0  0  0  0  0  0
   -0.4265   -0.3615    0.0000 N   0  0  0  0  0  0  0  0  0  0  0  0
    0.5964   -2.3046    0.0000 O   0  0  0  0  0  0  0  0  0  0  0  0
    1.5188   -1.2223    0.0000 C   0  0  0  0  0  0  0  0  0  0  0  0
    0.9708   -0.6607    0.0000 C   0  0  0  0  0  0  0  0  0  0  0  0
    2.9213   -1.5110    0.0000 N   0  0  0  0  0  0  0  0  0  0  0  0
    2.3681   -0.9600    0.0000 C   0  0  0  0  0  0  0  0  0  0  0  0
    4.3238   -1.8204    0.0000 N   0  0  0  0  0  0  0  0  0  0  0  0
    3.7653   -1.2592    0.0000 C   0  0  0  0  0  0  0  0  0  0  0  0
   -3.4378   -0.5649    0.0000 X   0  0  0  0  0  0  0  0  0  0  0  0
   -4.3238    2.3046    0.0000 O   0  0  0  0  0  0  0  0  0  0  0  0
    3.9789   -0.4623    0.0000 N   0  0  0  0  0  0  0  0  0  0  0  0
  1  2  1  0      
  2  3  1  0      
  3  4  1  0      
  4  5  1  0      
  5  6  1  0      
  6  1  1  0      
  3  7  1  0      
  7  8  1  0      
  8  9  1  0      
  9  4  1  0      
 10 11  2  0      
 12 13  1  0      
 13 14  1  0      
 14 10  1  0      
  8 10  1  0      
 12 15  2  0      
 16 17  1  0      
 17 13  1  0      
 18 19  1  0      
 19 16  1  0      
 20 21  1  0      
 21 18  1  0      
  7 22  1  0      
  1 23  1  0      
 21 24  2  0      
M  END
