# Supplementary material for: Diversity of Peptides Produced by Nodularia spumigena from Various Geographical Regions
Source: MDPI journal article supplement (doi:10.3390/md11010001), 2012-12-21
Supplement: s8 [file s8]

marinedrugs-11-00001-s004.mol
  corina  07071423013D 1   1.00000     0.00000 
CORINA 3.49 0023  12.04.2013
 59 61  0  0  0  0  0  0  0  0999 V2000
   -0.1477    1.5010   -0.1623 C   0  0  0  0  0  0  0  0  0  0  0  0
   -0.0565   -0.0008   -0.0798 C   0  0  0  0  0  0  0  0  0  0  0  0
    0.8402   -0.5989   -0.6357 O   0  0  0  0  0  0  0  0  0  0  0  0
    1.7016    0.7833   -1.9961 O   0  0  0  0  0  0  0  0  0  0  0  0
    2.0419    1.6553   -1.2250 C   0  0  0  0  0  0  0  0  0  0  0  0
    1.1964    2.0724   -0.2618 N   0  0  0  0  0  0  0  0  0  0  0  0
    4.3898    1.2164   -1.6646 N   0  0  0  0  0  0  0  0  0  0  0  0
    3.4110    2.2742   -1.3417 C   0  0  0  0  0  0  0  0  0  0  0  0
    6.4014   -2.3250    0.4977 C   0  0  0  0  0  0  0  0  0  0  0  0
    6.7208   -0.8305    0.4234 C   0  0  0  0  0  0  0  0  0  0  0  0
    6.2186   -0.2674   -0.9077 C   0  0  0  0  0  0  0  0  0  0  0  0
    5.1929    0.8048   -0.6443 C   0  0  0  0  0  0  0  0  0  0  0  0
    5.7677   -2.6427    1.8506 C   0  0  0  0  0  0  0  0  0  0  0  0
    5.2624   -4.0869    1.8501 C   0  0  0  0  0  0  0  0  0  0  0  0
    3.9968   -4.1438    2.6204 N   0  0  0  0  0  0  0  0  0  0  0  0
    2.8650   -4.2501    1.8603 C   0  0  0  0  0  0  0  0  0  0  0  0
    1.5281   -4.3142    2.5520 C   0  0  0  0  0  0  0  0  0  0  0  0
   -0.9607    1.8945   -1.3972 C   0  0  0  0  0  0  0  0  0  0  0  0
   -1.1599    3.4114   -1.4146 C   0  0  0  0  0  0  0  0  0  0  0  0
   -2.0466    0.0121    1.4087 C   0  0  0  0  0  0  0  0  0  0  0  0
   -1.0080   -0.6749    0.6369 N   0  0  0  0  0  0  0  0  0  0  0  0
   -0.9088   -2.1524    0.5729 C   0  0  0  0  0  0  0  0  0  0  0  0
    0.1548   -2.6069    1.5388 C   0  0  0  0  0  0  0  0  0  0  0  0
    0.7158   -1.8083    2.2589 O   0  0  0  0  0  0  0  0  0  0  0  0
   -2.2524   -2.7742    0.9589 C   0  0  0  0  0  0  0  0  0  0  0  0
    0.4752   -3.9303    1.5898 N   0  0  0  0  0  0  0  0  0  0  0  0
   -1.9608    3.7989   -2.6310 C   0  0  0  0  0  0  0  0  0  0  0  0
   -3.3407    3.8506   -2.5610 C   0  0  0  0  0  0  0  0  0  0  0  0
   -4.0771    4.2056   -3.6746 C   0  0  0  0  0  0  0  0  0  0  0  0
   -3.4309    4.5104   -4.8638 C   0  0  0  0  0  0  0  0  0  0  0  0
   -2.0462    4.4578   -4.9314 C   0  0  0  0  0  0  0  0  0  0  0  0
   -1.3141    4.1077   -3.8134 C   0  0  0  0  0  0  0  0  0  0  0  0
   -4.1531    4.8595   -5.9608 O   0  0  0  0  0  0  0  0  0  0  0  0
    2.9361   -4.2916    0.6503 O   0  0  0  0  0  0  0  0  0  0  0  0
    1.2750   -5.7394    3.0476 C   0  0  0  0  0  0  0  0  0  0  0  0
   -0.0035   -5.7744    3.8447 C   0  0  0  0  0  0  0  0  0  0  0  0
   -1.2059   -6.0283    3.2117 C   0  0  0  0  0  0  0  0  0  0  0  0
   -2.3786   -6.0604    3.9429 C   0  0  0  0  0  0  0  0  0  0  0  0
   -2.3488   -5.8391    5.3071 C   0  0  0  0  0  0  0  0  0  0  0  0
   -1.1463   -5.5862    5.9402 C   0  0  0  0  0  0  0  0  0  0  0  0
    0.0270   -5.5584    5.2097 C   0  0  0  0  0  0  0  0  0  0  0  0
    3.4054    3.3237   -2.4550 C   0  0  0  0  0  0  0  0  0  0  0  0
    4.7995    3.9415   -2.5805 C   0  0  0  0  0  0  0  0  0  0  0  0
    5.1337    4.7106   -1.3008 C   0  0  0  0  0  0  0  0  0  0  0  0
    3.0202    2.6608   -3.7790 C   0  0  0  0  0  0  0  0  0  0  0  0
    5.0845    1.2945    0.4599 O   0  0  0  0  0  0  0  0  0  0  0  0
    6.2997    0.0075   -3.5892 O   0  0  0  0  0  0  0  0  0  0  0  0
    7.2856    0.3983   -2.9946 C   0  0  0  0  0  0  0  0  0  0  0  0
    7.3436    0.3050   -1.6514 N   0  0  0  0  0  0  0  0  0  0  0  0
    9.0371   -1.1951   -5.0432 O   0  0  0  0  0  0  0  0  0  0  0  0
    8.7021   -0.2762   -5.7527 C   0  0  0  0  0  0  0  0  0  0  0  0
    8.2576    1.0264   -5.1389 C   0  0  0  0  0  0  0  0  0  0  0  0
    8.3206    0.9249   -3.6788 N   0  0  0  0  0  0  0  0  0  0  0  0
    8.7258   -0.4157   -7.0875 O   0  0  0  0  0  0  0  0  0  0  0  0
    7.2928    3.7893   -5.7229 C   0  0  0  0  0  0  0  0  0  0  0  0
    8.6539    3.4928   -5.0902 C   0  0  0  0  0  0  0  0  0  0  0  0
    9.1779    2.1534   -5.6120 C   0  0  0  0  0  0  0  0  0  0  0  0
    9.1799    5.9213   -4.8292 C   0  0  0  0  0  0  0  0  0  0  0  0
    9.6397    4.6039   -5.4570 C   0  0  0  0  0  0  0  0  0  0  0  0
  1  2  1  0      
  2  3  2  0      
  4  5  2  0      
  5  6  1  0      
  6  1  1  0      
  7  8  1  0      
  8  5  1  0      
  9 10  1  0      
 10 11  1  0      
 11 12  1  0      
 12  7  1  0      
  9 13  1  0      
 14 13  1  0      
 14 15  1  0      
 15 16  1  0      
 16 17  1  0      
  1 18  1  0      
 18 19  1  0      
 20 21  1  0      
 21  2  1  0      
 21 22  1  0      
 22 23  1  0      
 23 24  2  0      
 22 25  1  0      
 23 26  1  0      
 26 17  1  0      
 19 27  1  0      
 27 28  2  0      
 28 29  1  0      
 29 30  2  0      
 30 31  1  0      
 31 32  2  0      
 32 27  1  0      
 30 33  1  0      
 16 34  2  0      
 17 35  1  0      
 35 36  1  0      
 36 37  2  0      
 37 38  1  0      
 38 39  2  0      
 39 40  1  0      
 40 41  2  0      
 41 36  1  0      
  8 42  1  0      
 42 43  1  0      
 43 44  1  0      
 45 42  1  0      
 12 46  2  0      
 47 48  2  0      
 48 49  1  0      
 49 11  1  0      
 50 51  2  0      
 51 52  1  0      
 52 53  1  0      
 53 48  1  0      
 51 54  1  0      
 55 56  1  0      
 56 57  1  0      
 57 52  1  0      
 58 59  1  0      
 59 56  1  0      
M  END
$$$$
