# Supplementary material for: Diversity of Peptides Produced by Nodularia spumigena from Various Geographical Regions
Source: MDPI journal article supplement (doi:10.3390/md11010001), 2012-12-21
Supplement: s9 [file s9]

marinedrugs-11-00001-s004.mol
  ChemDraw06021422222D

 59 61  0  0  0  0  0  0  0  0999 V2000
   -2.8579    1.9932    0.0000 C   0  0  0  0  0  0  0  0  0  0  0  0
   -2.8579    1.1682    0.0000 C   0  0  0  0  0  0  0  0  0  0  0  0
   -2.1434    0.7557    0.0000 O   0  0  0  0  0  0  0  0  0  0  0  0
   -1.4289    1.1682    0.0000 O   0  0  0  0  0  0  0  0  0  0  0  0
   -1.4289    1.9932    0.0000 C   0  0  0  0  0  0  0  0  0  0  0  0
   -2.1434    2.4057    0.0000 N   0  0  0  0  0  0  0  0  0  0  0  0
   -0.0000    1.9932    0.0000 N   0  0  0  0  0  0  0  0  0  0  0  0
   -0.7145    2.4057    0.0000 C   0  0  0  0  0  0  0  0  0  0  0  0
    0.7145    0.7557    0.0000 C   0  0  0  0  0  0  0  0  0  0  0  0
    1.4289    1.1682    0.0000 C   0  0  0  0  0  0  0  0  0  0  0  0
    1.4289    1.9932    0.0000 C   0  0  0  0  0  0  0  0  0  0  0  0
    0.7145    2.4057    0.0000 C   0  0  0  0  0  0  0  0  0  0  0  0
    0.7145   -0.0693    0.0000 C   0  0  0  0  0  0  0  0  0  0  0  0
   -0.0000   -0.4818    0.0000 C   0  0  0  0  0  0  0  0  0  0  0  0
   -0.2135   -1.2787    0.0000 N   0  0  0  0  0  0  0  0  0  0  0  0
   -1.0385   -1.2787    0.0000 C   0  0  0  0  0  0  0  0  0  0  0  0
   -1.4510   -1.9932    0.0000 C   0  0  0  0  0  0  0  0  0  0  0  0
   -3.5724    2.4057    0.0000 C   0  0  0  0  0  0  0  0  0  0  0  0
   -4.2868    1.9932    0.0000 C   0  0  0  0  0  0  0  0  0  0  0  0
   -4.2868    1.1682    0.0000 C   0  0  0  0  0  0  0  0  0  0  0  0
   -3.5724    0.7557    0.0000 N   0  0  0  0  0  0  0  0  0  0  0  0
   -3.5724   -0.0693    0.0000 C   0  0  0  0  0  0  0  0  0  0  0  0
   -2.8579   -0.4818    0.0000 C   0  0  0  0  0  0  0  0  0  0  0  0
   -2.1434   -0.0693    0.0000 O   0  0  0  0  0  0  0  0  0  0  0  0
   -4.2868   -0.4818    0.0000 C   0  0  0  0  0  0  0  0  0  0  0  0
   -2.5765   -1.4924    0.0000 N   0  0  0  0  0  0  0  0  0  0  0  0
   -5.0013    2.4057    0.0000 C   0  0  0  0  0  0  0  0  0  0  0  0
   -5.0013    3.2307    0.0000 C   0  0  0  0  0  0  0  0  0  0  0  0
   -5.7158    3.6432    0.0000 C   0  0  0  0  0  0  0  0  0  0  0  0
   -6.4302    3.2307    0.0000 C   0  0  0  0  0  0  0  0  0  0  0  0
   -6.4302    2.4057    0.0000 C   0  0  0  0  0  0  0  0  0  0  0  0
   -5.7158    1.9932    0.0000 C   0  0  0  0  0  0  0  0  0  0  0  0
   -7.1447    3.6432    0.0000 O   0  0  0  0  0  0  0  0  0  0  0  0
   -1.2521   -0.4818    0.0000 O   0  0  0  0  0  0  0  0  0  0  0  0
   -1.4510   -2.8182    0.0000 C   0  0  0  0  0  0  0  0  0  0  0  0
   -2.1655   -3.2307    0.0000 C   0  0  0  0  0  0  0  0  0  0  0  0
   -2.8800   -2.8182    0.0000 C   0  0  0  0  0  0  0  0  0  0  0  0
   -3.5944   -3.2307    0.0000 C   0  0  0  0  0  0  0  0  0  0  0  0
   -3.5944   -4.0557    0.0000 C   0  0  0  0  0  0  0  0  0  0  0  0
   -2.8800   -4.4682    0.0000 C   0  0  0  0  0  0  0  0  0  0  0  0
   -2.1655   -4.0557    0.0000 C   0  0  0  0  0  0  0  0  0  0  0  0
   -0.7145    3.2307    0.0000 C   0  0  0  0  0  0  0  0  0  0  0  0
   -0.0000    3.6432    0.0000 C   0  0  0  0  0  0  0  0  0  0  0  0
   -0.0000    4.4682    0.0000 C   0  0  0  0  0  0  0  0  0  0  0  0
   -1.4289    3.6432    0.0000 C   0  0  0  0  0  0  0  0  0  0  0  0
    0.7145    3.2307    0.0000 O   0  0  0  0  0  0  0  0  0  0  0  0
    2.8579    1.1682    0.0000 O   0  0  0  0  0  0  0  0  0  0  0  0
    2.8579    1.9932    0.0000 C   0  0  0  0  0  0  0  0  0  0  0  0
    2.1434    2.4057    0.0000 N   0  0  0  0  0  0  0  0  0  0  0  0
    3.5724    0.7557    0.0000 O   0  0  0  0  0  0  0  0  0  0  0  0
    4.2868    1.1682    0.0000 C   0  0  0  0  0  0  0  0  0  0  0  0
    4.2868    1.9932    0.0000 C   0  0  0  0  0  0  0  0  0  0  0  0
    3.5724    2.4057    0.0000 N   0  0  0  0  0  0  0  0  0  0  0  0
    5.0013    0.7557    0.0000 O   0  0  0  0  0  0  0  0  0  0  0  0
    5.7158    1.1682    0.0000 C   0  0  0  0  0  0  0  0  0  0  0  0
    5.7158    1.9932    0.0000 C   0  0  0  0  0  0  0  0  0  0  0  0
    5.0013    2.4057    0.0000 C   0  0  0  0  0  0  0  0  0  0  0  0
    7.1447    1.9932    0.0000 C   0  0  0  0  0  0  0  0  0  0  0  0
    6.4302    2.4057    0.0000 C   0  0  0  0  0  0  0  0  0  0  0  0
  1  2  1  0      
  2  3  2  0      
  4  5  2  0      
  5  6  1  0      
  6  1  1  0      
  7  8  1  0      
  8  5  1  0      
  9 10  1  0      
 10 11  1  0      
 11 12  1  0      
 12  7  1  0      
  9 13  1  0      
 14 13  1  0      
 14 15  1  0      
 15 16  1  0      
 16 17  1  0      
  1 18  1  0      
 18 19  1  0      
 20 21  1  0      
 21  2  1  0      
 21 22  1  0      
 22 23  1  0      
 23 24  2  0      
 22 25  1  0      
 23 26  1  0      
 26 17  1  0      
 19 27  1  0      
 27 28  2  0      
 28 29  1  0      
 29 30  2  0      
 30 31  1  0      
 31 32  2  0      
 32 27  1  0      
 30 33  1  0      
 16 34  2  0      
 17 35  1  0      
 35 36  1  0      
 36 37  2  0      
 37 38  1  0      
 38 39  2  0      
 39 40  1  0      
 40 41  2  0      
 41 36  1  0      
  8 42  1  0      
 42 43  1  0      
 43 44  1  0      
 45 42  1  0      
 12 46  2  0      
 47 48  2  0      
 48 49  1  0      
 49 11  1  0      
 50 51  2  0      
 51 52  1  0      
 52 53  1  0      
 53 48  1  0      
 51 54  1  0      
 55 56  1  0      
 56 57  1  0      
 57 52  1  0      
 58 59  1  0      
 59 56  1  0      
M  END
